# Supplementary material
Source: publisher site journal article supplement (https://www.dovepress.com/article/220536)
Supplement: Supplementary file 1 [file get_supplementary_file.php]

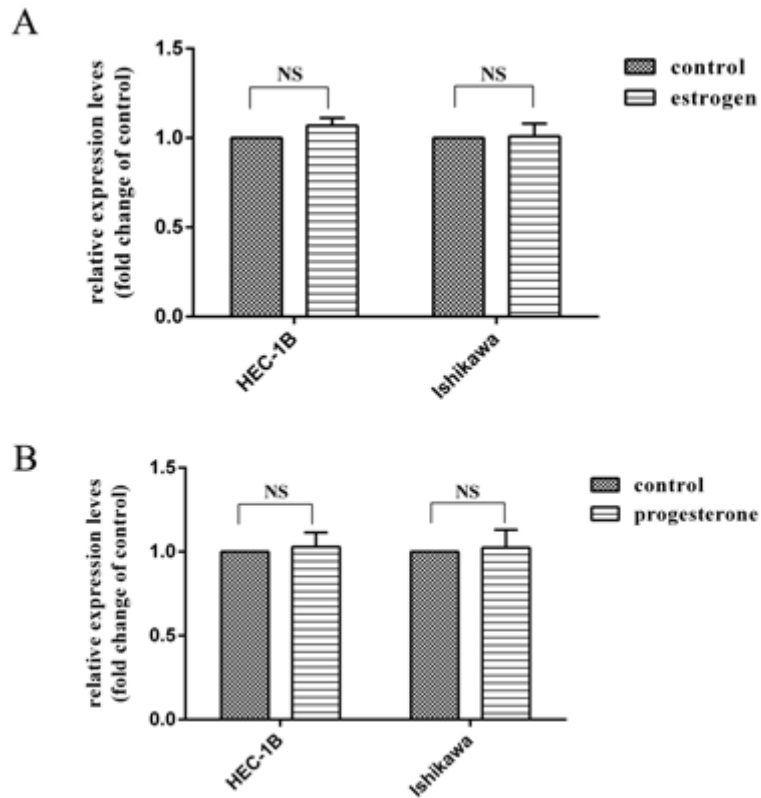

1

2 **Figure suppl 1.** SOX17 expression is not correlated with estrogen and progesterone  
 3 in endometrial cancer (EC) cells. Real-time PCR were used to detect SOX17  
 4 expression in HEC-1B and Ishikawa cell lines. (A) Estrogen (10 nM) for 48 hours, the  
 5 expression of SOX17 in EC cells, with no significant statistic differences. (B)  
 6 Progesterone (10 nM) for 48 hours, the expression of SOX17.

7
